# Supplementary material for: Investigation into the Anti-Acne Effects of Castanea sativa Mill Leaf and Its Pure Ellagitannin Castalagin in HaCaT Cells Infected with Cutibacterium acnes
Source: MDPI journal article supplement (doi:10.3390/ijms25094764), 2024-04-27
Supplement: s1 [file s1]

Supplementary

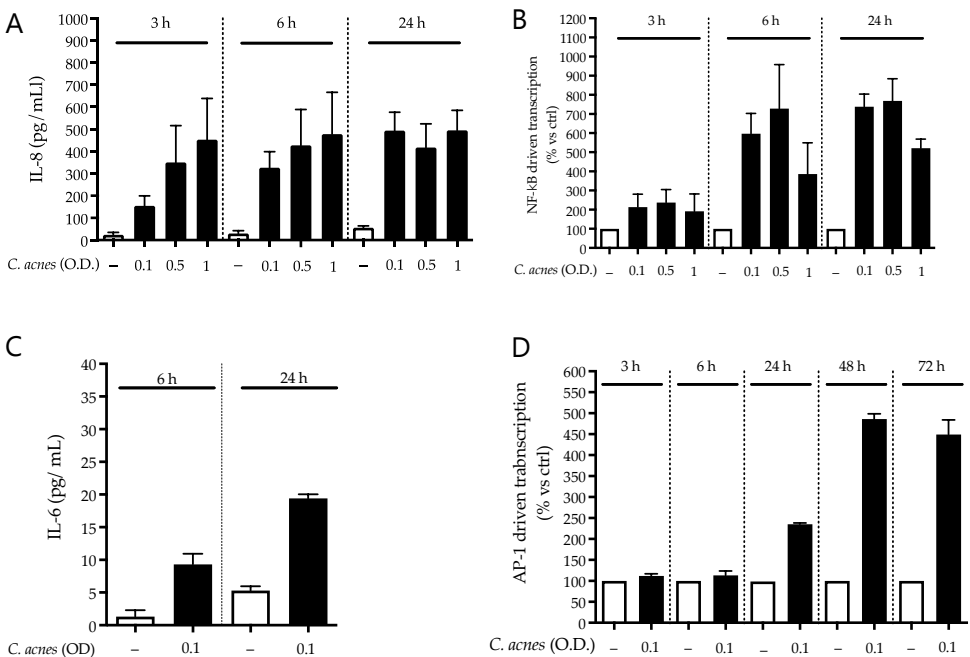

Figure S1. Time-course experiments concerning the inflammatory effect of *C. acnes* on HaCaT cells. Different loads (O.D.  $_{600\text{ nm}}$ ) of *C. acnes* were used to infect HaCaT cells for different time: the release of IL-8 (A) and the NF- $\kappa$ B driven transcription (B) were already increased by O.D.=0.1 and peaked after 24 h. Using the same bacterial load, the increase of IL-6 release (C) and AP-1 driven transcription (D) were measured.

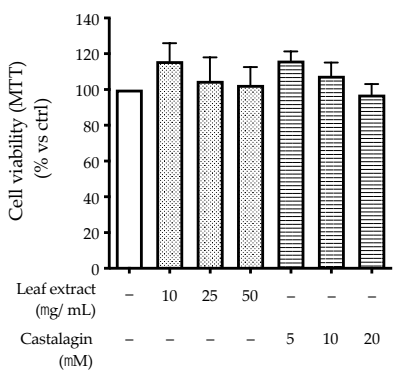

Figure S2. HaCaT cells viability measured by MTT test after treatment with various concentrations of *C. sativa* leaf extract and castalagin for 48 h.
